# Supplementary material
Source: PubMed Central journal article supplement (PMC4262774)
Supplement: cdd2014120x1.pdf [file cdd2014120x1.pdf]

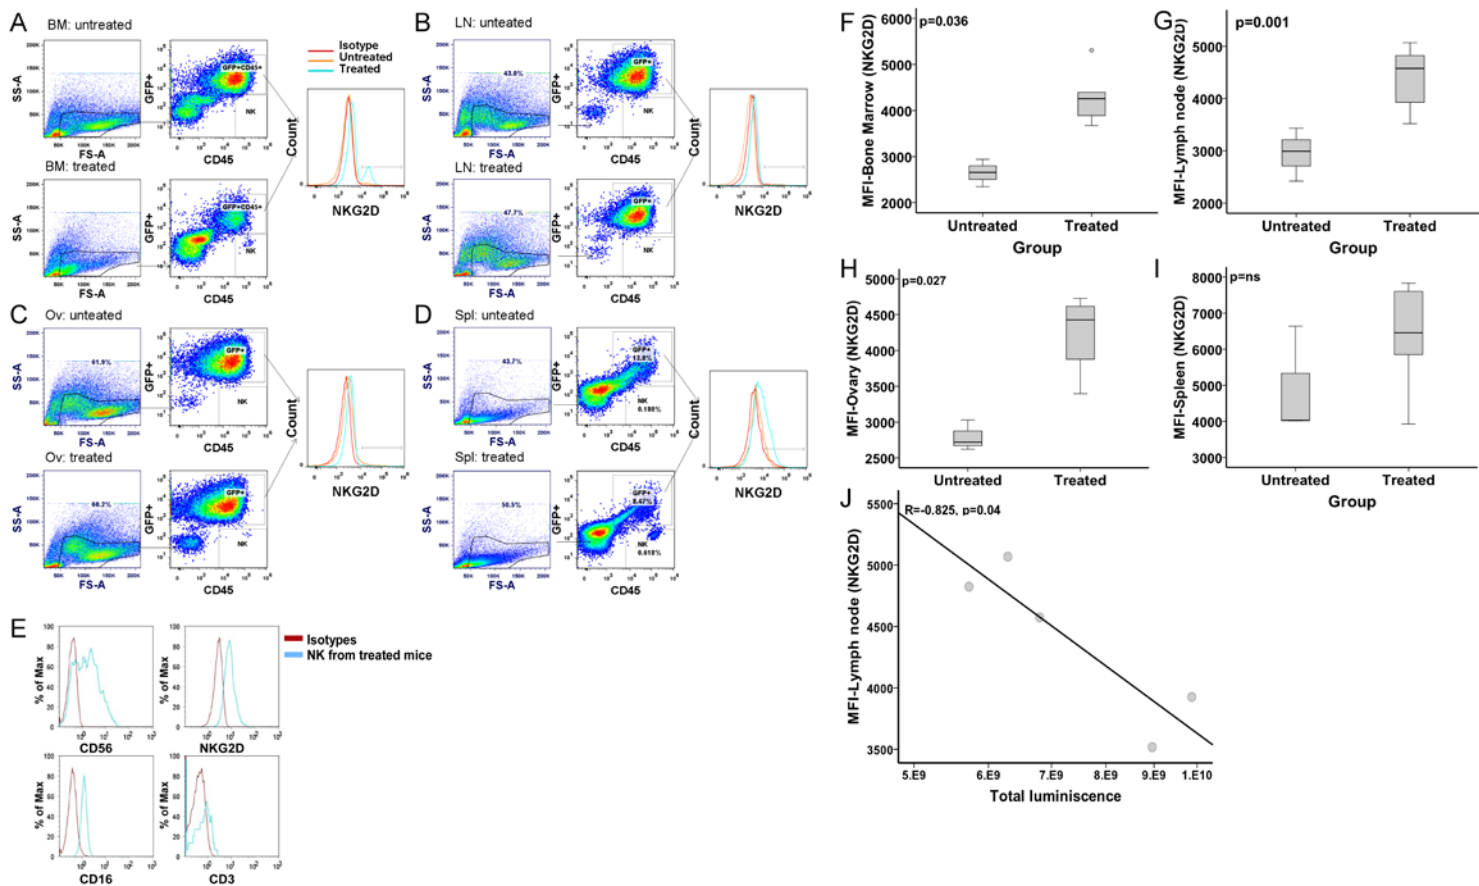

**Supplementary Figure 1: NKG2D expression in multiple myeloma (MM) cells after cord blood derived natural killer cell (CB-NK) treatment correlates with good prognosis in an *in vivo* murine MM model:** A to D: Flow cytometry plots showing ARP1 cells in mice in the different tissues and the comparison of median fluorescence intensity (MFI) for NKG2D in ARP1 cells in bone marrow (BM) (A), lymph node areas (LN) (B), ovaries (Ov) (C), and spleen (Spl) (D) in untreated vs CB-NK treated mice. E: representative plot of the phenotype of CB-NK detected in CB-NK treated mice. F to I: Comparison analysis in all the mice of MFI values for NKG2D in ARP1 cells from plots corresponding to A, B, C and D. J: Correlation analysis for MFI for NKG2D in LN areas with the total luminescence coming from ARP1 cells in mice treated with CB-NK. Correlation coefficient (R) and p values are shown.

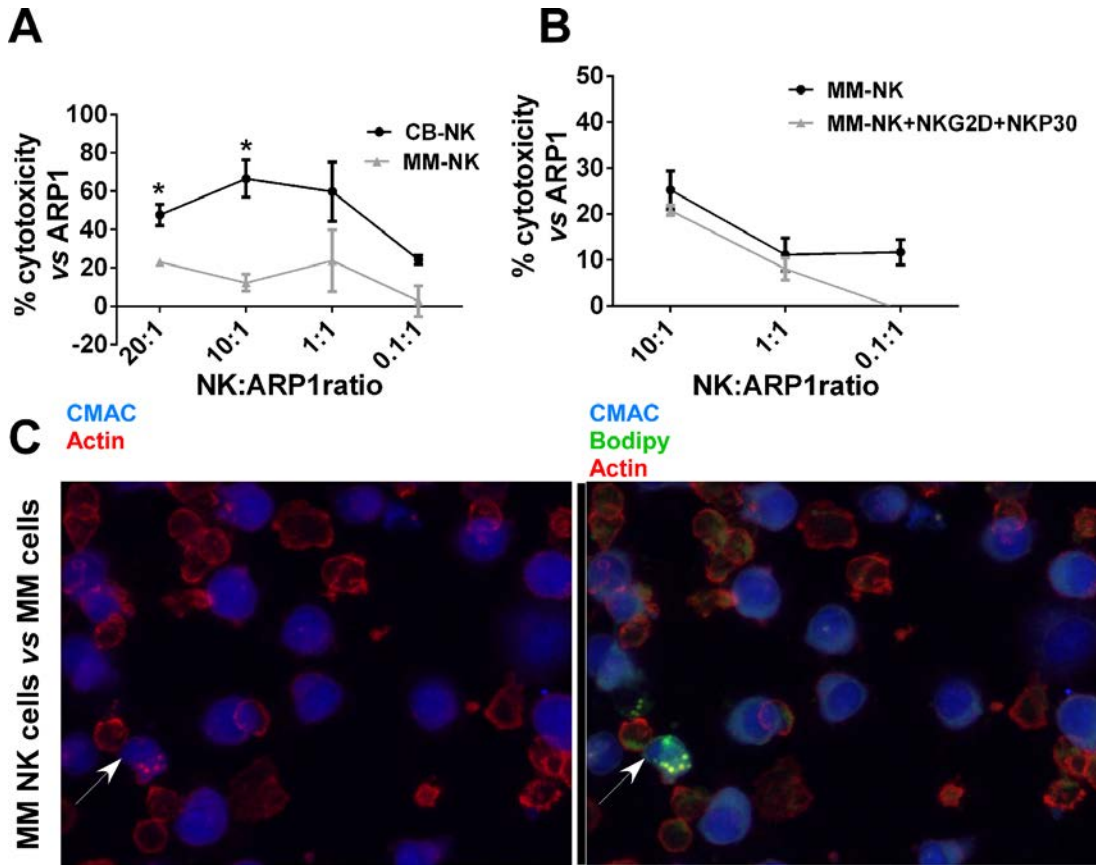

**Supplementary Figure 2: NK from MM patients (MM-NK) are less cytotoxic than CB-NK and NKG2D and NKP30 don't have a relevant role in the MM-NK cytotoxicity vs MM cells.** **A:** Cytotoxicity assay of both CB-NK and MM-NK as effectors vs ARP1 MM cells. **B:** MM-NK cytotoxicity reduction vs ARP1 MM cells after blocking NKG2D and NKP30 (MM-NK+NKG2D +NKP30) in NK-MM. **C:** Confocal fluorescence images of MM-NK (in green with bodipy) vs ARP1 MM cells (in blue with CMAC). Actin is shown in red. Arrows indicate some transfer of contents between MM-NK and ARP1 MM cells. \* indicates  $p \leq 0.05$ .

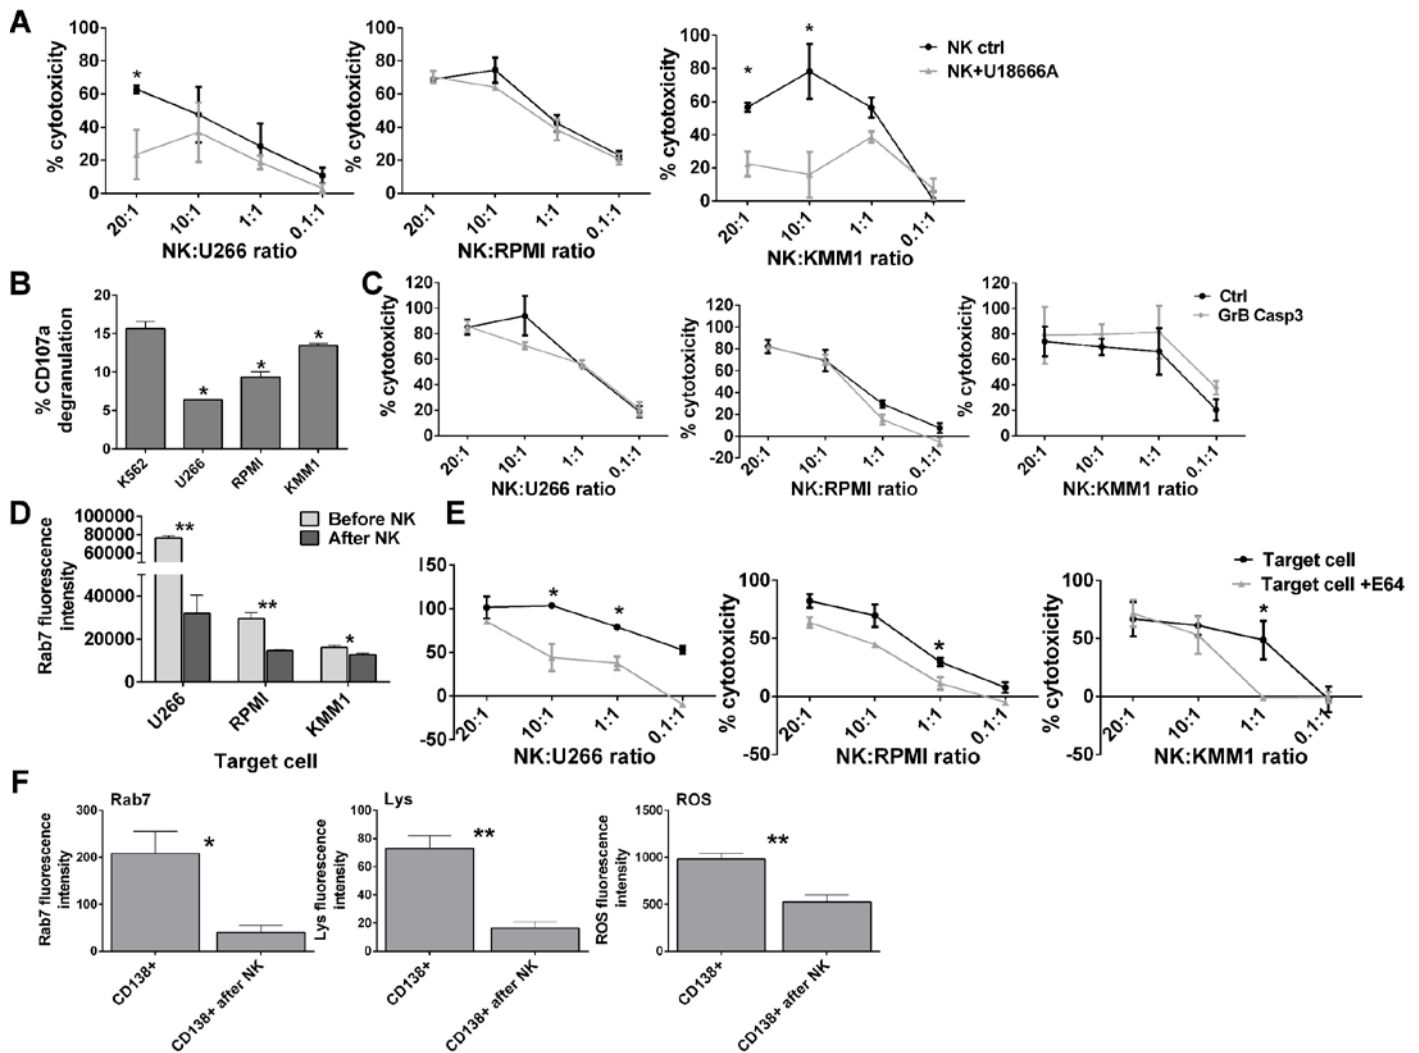

**Supplementary Figure 3: CB-NK induce cell death in MM cells by a mechanism which involves lipid transfer, is Granzyme-B and Caspase-3 independent cell death and involves lysosomal cell death.** **A:** CB-NK cytotoxicity reduction in MM cell lines (U266, RPMI and KMM1) after incubating CB-NK with U18666A (NK+U18666A) for 2 hours. **B:** Mean±SEM values of CB-NK degranulation (CD107a expression) after 4 hours of incubation with K562 or MM cells (n=3). P values represent comparison of K562 vs MM cells. **C:** CB-NK cytotoxicity reduction after inhibiting GrB in CB-NK and Caspase-3 (GrB Casp3) in target MM cells. **D:** Mean±SEM values of Rab7 levels in MM cells before and after co-culture with CB-NK for 40 minutes. **E:** CB-NK cytotoxicity reduction after inhibiting cysteine cathepsins (with E64) in target cells (Target cell+E64). **F:** Mean±SEM values of Rab7, lysosomes (Lys: Lyso-tracker), and ROS levels in primary CD138+MM cells before and after co-culture with CB-NK for 40 minutes. Values in **D** and **F** were determined by confocal fluorescence microscopy after labeling MM cells in blue (CMAC) and CB-NK in green (Bodipy). \* indicates  $p \leq 0.05$ .

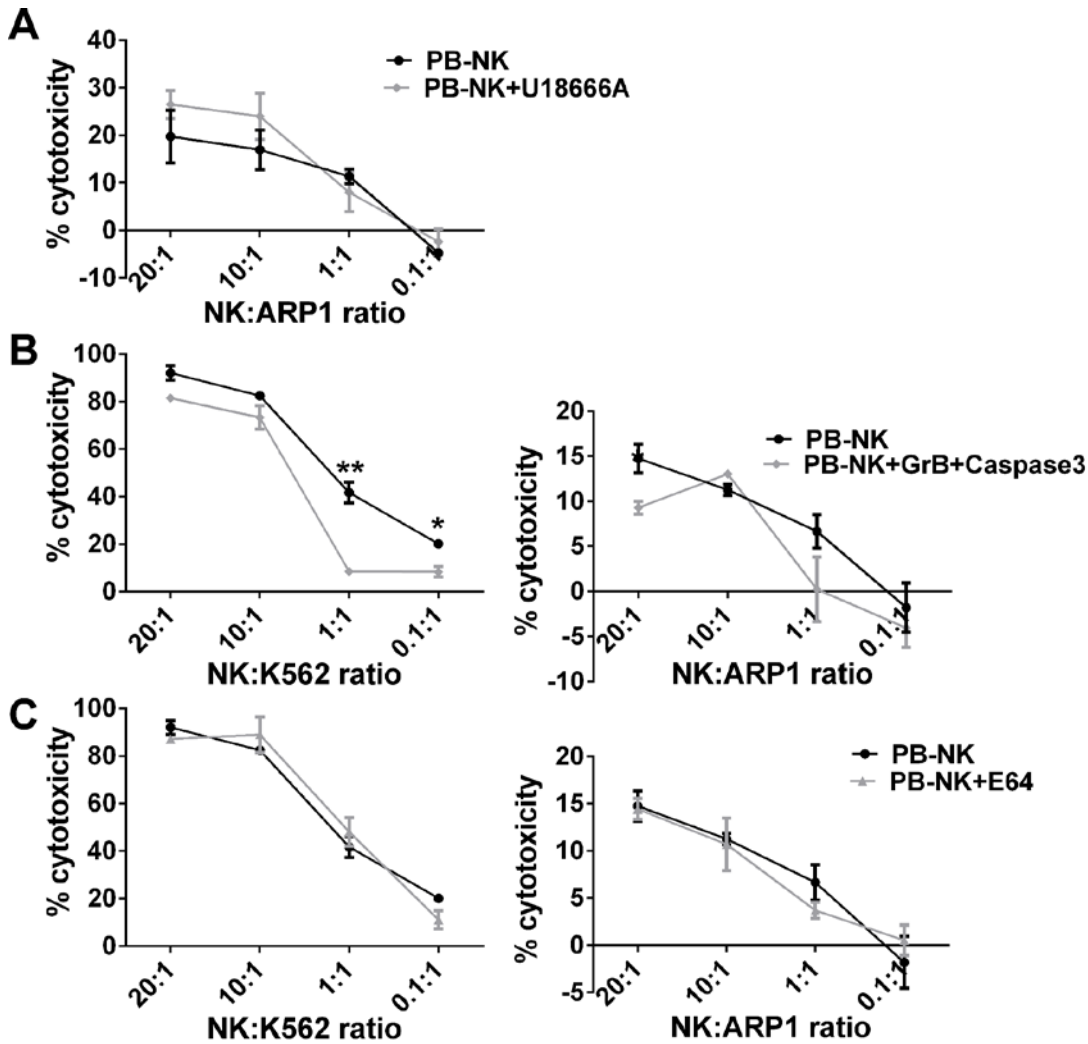

**Supplementary Figure 4: Cytotoxicity of peripheral blood NK (PB-NK) in healthy individuals is different from CB-NK cytotoxicity. A:** PB-NK cytotoxicity reduction vs ARP1 MM cells after incubating PB-NK with U18666A for 2 hours (PB-NK+U18666A). **B:** PB-NK cytotoxicity reduction after inhibiting GrB in PB-NK and Caspase-3 in target K562 and ARP1 cells (PB-NK+GrB+Caspase3). **C:** PB-NK cytotoxicity reduction after inhibiting cysteine cathepsins in target K562 and ARP1 cells (PB-NK+E64) with E64 previous to the assay.
